# Supplementary material for: Microwave-assisted deep eutectic solvent extraction coupled with headspace solid-phase microextraction followed by GC-MS for the analysis of volatile compounds from tobacco
Source: Royal Society of Chemistry journal article supplement (doi:10.1039/c6ay03076a), 2016-12-26
Supplement: c6ay03076a1.pdf [file c6ay03076a1.pdf]

**Supporting information for**

**Microwave-assisted deep eutectic solvent extraction coupled with headspace solid-phase microextraction followed by GC-MS for analysis of volatile compounds from tobacco**

Jing Nie<sup>a</sup>, Guowei Yu<sup>a</sup>, Zhiyu Song<sup>a</sup>, Xiajun Wang<sup>a</sup>, Zuguang Li<sup>a,\*</sup>, Yuanbin She, Mawrong Lee<sup>b</sup>

---

<sup>a</sup> *College of Chemical Engineering, Zhejiang University of Technology, Hangzhou 310014, China.*

<sup>b</sup> *Department of Chemistry, National Chung-Hsing University, Taichung 40227, Taiwan.*

*\* corresponding author*

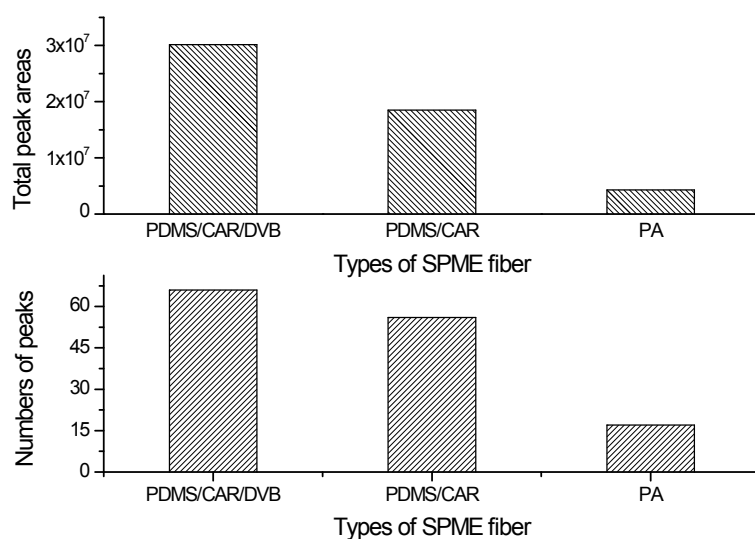

**Fig. S1** Effect of types of SPME fiber. Extraction conditions are followed: solvent, DES-2; microwave power, 300 W; set-up temperature, 75 °C; irradiation time, 60 s.

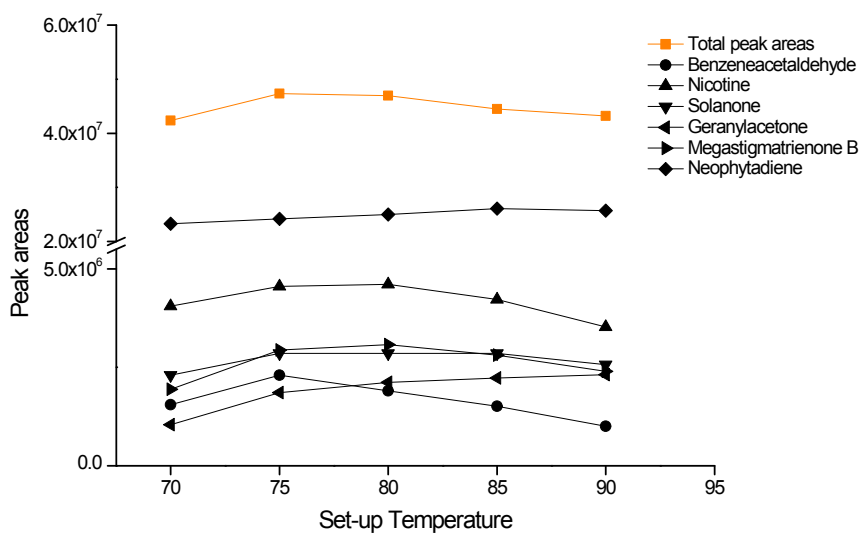

**Fig. S2** Effect of set-up temperature. Extraction conditions are followed: fibre, PDMS/DVB/CAR, 50/30 um; solvent, DES-2; microwave power, 500 W; irradiation time, 60 s.

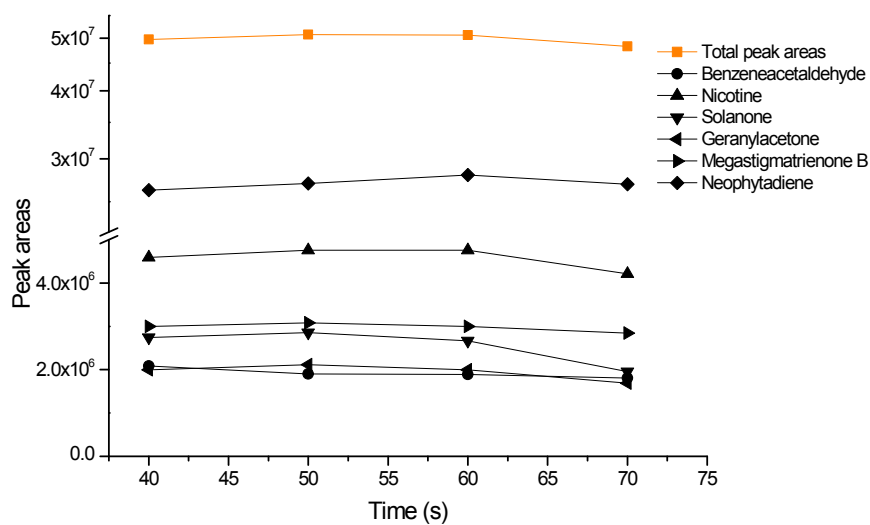

**Fig.S3** Effect of irradiation time. Extraction conditions are followed: fibre, PDMS/DVB/CAR, 50/30  $\mu$ m; solvent, DES-2; microwave power, 500 W; set-up temperature, 80  $^{\circ}$ C.

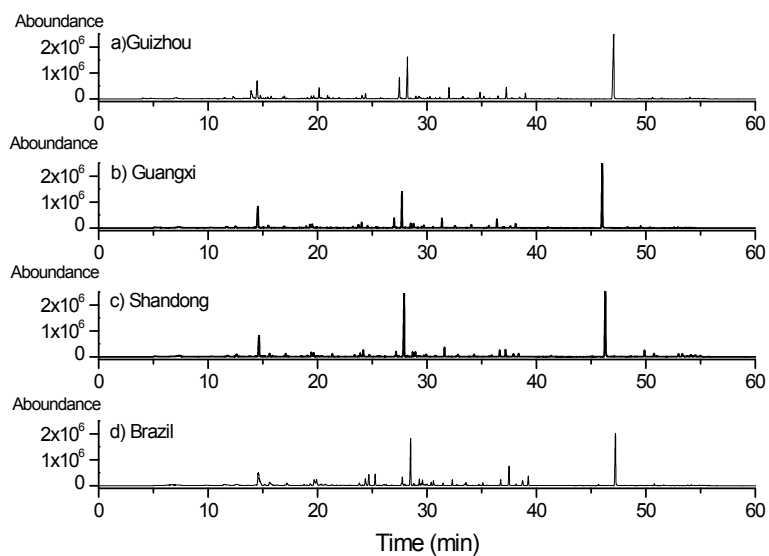

**Fig.S4** The total ion chromatograms of volatile compounds in tobacco from different regions

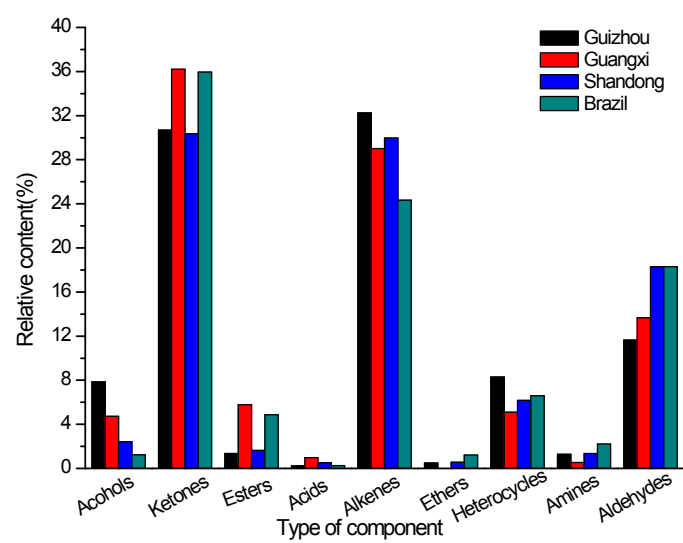

**Fig.S5** The relative contents of compounds in tobacco from different regions

**Table S1.** The volatile components in tobacco obtained by MADESE-SPME, MAE-SPME and SPME

| Retention time (min) | Compounds                   | Formul a                                      | Molecular weight | RI <sup>a</sup> (RI <sup>b</sup> ) | Identification <sup>c</sup> | Relative content (%) |          |      |
|----------------------|-----------------------------|-----------------------------------------------|------------------|------------------------------------|-----------------------------|----------------------|----------|------|
|                      |                             |                                               |                  |                                    |                             | MADESE-SPME          | MAE-SPME | SPME |
| 12.44                | 6-Methyl-5-hepten-2-one     | C <sub>8</sub> H <sub>14</sub> O              | 120              | 980(984)                           | RI, MS                      | 1.20                 | 2.78     | --   |
| 13.37                | Hexyl acetate               | C <sub>8</sub> H <sub>16</sub> O <sub>2</sub> | 144              | 1007(1008)                         | RI, MS                      | 0.18                 | 0.68     | --   |
| 13.81                | 1-Isopropyl-2-methylbenzene | C <sub>10</sub> H <sub>14</sub>               | 134              | 1019(1019)                         | RI, MS                      | 0.15                 | --       | --   |
| 13.92                | <i>o</i> -Cymene            | C <sub>10</sub> H <sub>14</sub>               | 134              | 1022(1021)                         | RI, MS                      | --                   | 0.57     | --   |
| 14.01                | Limonene                    | C <sub>10</sub> H <sub>16</sub>               | 136              | 1024(1026)                         | RI, MS                      | 2.23                 | 19.58    | --   |
| 14.20                | Benzyl Alcohol              | C <sub>7</sub> H <sub>8</sub> O               | 108              | 1031(1032)                         | RI, MS                      | 2.12                 | 1.32     | 1.56 |
| 14.53                | Benzeneacetaldehyde         | C <sub>8</sub> H <sub>8</sub> O               | 120              | 1038(1040)                         | RI, MS                      | 7.92                 | 0.63     | 0.11 |
| 14.83                | <i>p</i> -Menth-4(8)-ene    | C <sub>10</sub> H <sub>18</sub>               | 138              | 1046(1041)                         | RI, MS                      | 1.09                 | 2.51     | 0.12 |
| 15.11                | $\tau$ -Terpinene           | C <sub>10</sub> H <sub>16</sub>               | 136              | 1053(1055)                         | RI, MS                      | 0.40                 | 0.52     | 0.11 |
| 15.48                | <i>m</i> -Tolualdehyde      | C <sub>8</sub> H <sub>8</sub> O               | 120              | 1063                               | MS                          | 0.65                 | 0.47     | --   |
| 15.79                | <i>N</i> -methyl-Aniline    | C <sub>7</sub> H <sub>9</sub> N               | 107              | 1071(1069)                         | RI, MS                      | 0.80                 | 1.88     | --   |
| 16.82                | Linalol                     | C <sub>10</sub> H <sub>18</sub> O             | 154              | 1098(1098)                         | RI, MS                      | 0.81                 | 1.13     | 0.23 |
| 16.95                | ( <i>Z</i> )-6-Nonenal      | C <sub>9</sub> H <sub>16</sub> O              | 140              | 1098(1101)                         | RI, MS                      | 0.80                 | 0.61     | --   |
| 17.17                | 2-Phenylaziridine           | C <sub>8</sub> H <sub>9</sub> N               | 119              | 1107                               | MS                          | 0.24                 | --       | --   |
| 17.91                | Phenylethyl alcohol         | C <sub>8</sub> H <sub>10</sub> O              | 122              | 1124(1121)                         | RI, MS                      | 0.08                 | 0.2      | 0.56 |
| 18.70                | Camphor                     | C <sub>10</sub> H <sub>16</sub> O             | 152              | 1143(1143)                         | RI, MS                      | 0.15                 | 0.13     | 0.10 |
| 18.95                | 2-Phenylpropenal            | C <sub>9</sub> H <sub>8</sub> O               | 132              | 1149(1148)                         | RI, MS                      | 0.43                 | --       | --   |
| 19.31                | 3-Ethyl-benzaldehyde        | C <sub>9</sub> H <sub>10</sub> O              | 134              | 1158(1161)                         | RI, MS                      | 0.71                 | --       | --   |
| 19.36                | Benzyl acetate              | C <sub>9</sub> H <sub>10</sub> O <sub>2</sub> | 150              | 1159(1161)                         | RI, MS                      | --                   | 0.19     | --   |

|       |                                                          |                                                |     |            |        |       |       |       |
|-------|----------------------------------------------------------|------------------------------------------------|-----|------------|--------|-------|-------|-------|
| 19.52 | 1,4-Benzodioxan                                          | C <sub>8</sub> H <sub>8</sub> O <sub>2</sub>   | 136 | 1163(1164) | RI, MS | 0.64  | --    | --    |
| 19.74 | 2,4-Dimethyl-benzaldehyde                                | C <sub>9</sub> H <sub>10</sub> O               | 134 | 1168       | MS     | --    | 0.44  | --    |
| 19.66 | Berbenol                                                 | C <sub>10</sub> H <sub>16</sub> O              | 152 | 1166(1161) | RI, MS | 0.14  | --    | --    |
| 19.81 | 2,6-Dimethylbenzaldehyde                                 | C <sub>9</sub> H <sub>10</sub> O               | 134 | 1170       | MS     | 0.15  | --    | --    |
| 20.01 | Menthol                                                  | C <sub>10</sub> H <sub>20</sub> O              | 156 | 1175(1171) | RI, MS | 3.05  | 6.86  | 0.10  |
| 20.20 | Naphthalene                                              | C <sub>10</sub> H <sub>8</sub>                 | 128 | 1186(1189) | RI, MS | 0.06  | --    | --    |
| 20.72 | $\alpha$ -Terpineol                                      | C <sub>10</sub> H <sub>18</sub> O              | 154 | 1192(1189) | RI, MS | 0.84  | 1.31  | 0.12  |
| 20.86 | 2,6,6-Trimethyl-1,3-cyclohexadiene-1-carboxaldehyde      | C <sub>10</sub> H <sub>14</sub> O              | 154 | 1195(1200) | RI, MS | 0.40  | 0.71  | --    |
| 21.20 | Myrtenal                                                 | C <sub>10</sub> H <sub>14</sub> O              | 154 | 1203(1201) | RI, MS | 0.24  | 0.4   | 0.12  |
| 21.71 | $\beta$ -Cyclocitral                                     | C <sub>10</sub> H <sub>16</sub> O              | 152 | 1215(1219) | RI, MS | 0.35  | 0.94  | 0.11  |
| 22.39 | Methyl thymyl ether                                      | C <sub>11</sub> H <sub>16</sub> O              | 164 | 1231(1235) | RI, MS | 0.10  | 0.28  | 0.10  |
| 22.48 | 2-Methylbutyricacid hexyl ester                          | C <sub>11</sub> H <sub>22</sub> O <sub>2</sub> | 186 | 1233(1236) | RI, MS | 0.23  | --    | --    |
| 23.23 | <i>p</i> -Formylanisole                                  | C <sub>8</sub> H <sub>8</sub> O <sub>2</sub>   | 136 | 1249(1245) | RI, MS | 0.40  | --    | --    |
| 23.75 | 2-methoxy-4-methyl-benzenamine                           | C <sub>8</sub> H <sub>11</sub> NO              | 137 | 1263(1294) | RI, MS | 1.27  | --    | --    |
| 24.04 | Butoxy-benzene                                           | C <sub>10</sub> H <sub>14</sub> O              | 150 | 1270       | MS     | 1.59  | --    | --    |
| 24.57 | Bornyl acetate                                           | C <sub>10</sub> H <sub>12</sub> O              | 148 | 1283(1287) | RI, MS | 0.09  | 0.12  | 0.14  |
| 25.37 | 2-(Phenylmethyl)-1,3-dioxolane                           | C <sub>10</sub> H <sub>12</sub> O <sub>2</sub> | 164 | 1301       | MS     | 0.37  | --    | --    |
| 25.54 | Cuminic alcohol                                          | C <sub>10</sub> H <sub>14</sub> O              | 150 | 1305(1305) | RI, MS | 0.17  | --    | --    |
| 27.02 | Nicotine                                                 | C <sub>10</sub> H <sub>14</sub> N <sub>2</sub> | 162 | 1340(1344) | RI, MS | 6.24  | 3.97  | 31.79 |
| 27.23 | $\alpha$ -Ionene                                         | C <sub>13</sub> H <sub>18</sub>                | 174 | 1346(1349) | RI,MS  | 0.13  | --    | --    |
| 27.75 | Solanone                                                 | C <sub>13</sub> H <sub>22</sub> O              | 194 | 1358(1360) | RI, MS | 13.06 | 11.84 | 1.97  |
| 28.02 | 5,5-Dimethyl-3-propenyl-2-cyclohexen-1-one               | C <sub>11</sub> H <sub>16</sub> O              | 164 | 1363       | MS     | 0.20  | 0.18  | 0.18  |
| 28.34 | Ylangene                                                 | C <sub>15</sub> H <sub>24</sub>                | 204 | 1370(1374) | RI, MS | --    | --    | 0.91  |
| 28.52 | 1-(2,6,6-Trimethyl-1,3-cyclohexadien-1-yl)-2-buten-1-one | C <sub>13</sub> H <sub>18</sub> O              | 190 | 1375(1373) | RI, MS | 0.65  | 0.95  | 0.13  |

|       |                                                                |                                                |     |            |        |       |       |       |
|-------|----------------------------------------------------------------|------------------------------------------------|-----|------------|--------|-------|-------|-------|
| 28.78 | $\alpha$ -Damascenone                                          | C <sub>13</sub> H <sub>18</sub> O              | 190 | 1381(1378) | RI, MS | 1.36  | 0.54  | 0.13  |
| 29.73 | $\beta$ -Damascone                                             | C <sub>13</sub> H <sub>20</sub> O              | 192 | 1403(1402) | RI, MS | 0.55  | 0.83  | 1.51  |
| 30.23 | $\alpha$ -Santalene                                            | C <sub>15</sub> H <sub>24</sub>                | 204 | 1416(1417) | RI, MS | 0.19  | 0.21  | 0.29  |
| 30.57 | Methyl 9-oxodecanoate                                          | C <sub>11</sub> H <sub>20</sub> O <sub>3</sub> | 200 | 1424(1429) | RI, MS | 0.44  | --    |       |
| 31.38 | Geranylacetone                                                 | C <sub>13</sub> H <sub>22</sub> O              | 194 | 1444(1445) | RI, MS | 2.91  | 2.98  | 1.87  |
| 32.58 | $\beta$ -Ionone                                                | C <sub>13</sub> H <sub>20</sub> O              | 192 | 1473(1470) | RI, MS | 0.48  | 0.39  | 0.85  |
| 32.82 | Nicotyrine                                                     | C <sub>10</sub> H <sub>10</sub> N <sub>2</sub> | 158 | 1478       | MS     | --    | --    | 1.21  |
| 33.04 | $\beta$ -Eudesmene                                             | C <sub>15</sub> H <sub>24</sub>                | 204 | 1485(1486) | RI, MS | 0.28  | 0.1   | --    |
| 33.10 | $\beta$ -Himachalene                                           | C <sub>15</sub> H <sub>24</sub>                | 204 | 1490(1495) | RI, MS | --    | 0.13  | --    |
| 33.82 | 4-(5,5-Dimethyl-1-oxaspiro[2.5]oct-4-yl)-3-buten-2-one         | C <sub>13</sub> H <sub>22</sub> O <sub>2</sub> | 210 | 1504(1501) | RI, MS | 0.32  | --    | --    |
| 33.88 | $\alpha$ -Farnesene                                            | C <sub>15</sub> H <sub>24</sub>                | 204 | 1506(1508) | RI, MS | --    | 0.15  | --    |
| 34.08 | Octahydro-4a-methyl-1,5-naphthalenedione                       | C <sub>11</sub> H <sub>16</sub> O <sub>2</sub> | 180 | 1511       | MS     | 1.84  | 1.09  | --    |
| 34.39 | Spiro[5.6]dodecan-7-one                                        | C <sub>12</sub> H <sub>20</sub> O              | 180 | 1519(1524) | RI, MS | 0.76  | 0.53  | 1.11  |
| 34.67 | 4,5,7,7a-Tetrahydro-4,4,7a-trimethyl-2(6H)benzofuranone        | C <sub>11</sub> H <sub>16</sub> O <sub>2</sub> | 180 | 1526(1528) | RI, MS | --    | --    | 0.83  |
| 34.89 | Nerolidol                                                      | C <sub>15</sub> H <sub>26</sub> O              | 222 | 1532(1533) | RI, MS | 0.20  | 0.17  | --    |
| 35.66 | Megastigmatrienone A                                           | C <sub>13</sub> H <sub>18</sub> O              | 190 | 1551(1555) | RI, MS | 0.82  | 0.53  | 0.35  |
| 36.41 | Megastigmatrienone B                                           | C <sub>13</sub> H <sub>18</sub> O              | 190 | 1571(1573) | RI, MS | 3.33  | 1.87  | 1.05  |
| 36.92 | Bisisobutyric acid 1-tert-butyl-2-methylpropane-1,3-diyl ester | C <sub>16</sub> H <sub>30</sub> O <sub>4</sub> | 286 | 1584       | MS     | 0.26  | 0.26  | --    |
| 37.61 | Megastigmatrienone C                                           | C <sub>13</sub> H <sub>18</sub> O              | 190 | 1602(1604) | RI, MS | 0.56  | 0.4   | 0.41  |
| 38.12 | Megastigmatrienone D                                           | C <sub>13</sub> H <sub>18</sub> O              | 190 | 1615(1617) | RI, MS | 1.60  | 0.85  | 0.67  |
| 44.96 | Solavetivone                                                   | C <sub>15</sub> H <sub>22</sub> O              | 218 | 1798(1796) | RI, MS | 0.32  | 0.27  | 0.29  |
| 46.07 | Neophytadiene                                                  | C <sub>20</sub> H <sub>38</sub>                | 278 | 1833(1836) | RI, MS | 25.56 | 21.06 | 46.18 |
| 47.81 | 3,7,11,15-Tetramethyl-2-hexadecen-1-ol                         | C <sub>20</sub> H <sub>40</sub> O              | 296 | 1878(1882) | RI, MS | --    | --    | 0.39  |

|       |                                                                                            |                                                |     |            |        |      |      |      |
|-------|--------------------------------------------------------------------------------------------|------------------------------------------------|-----|------------|--------|------|------|------|
| 48.93 | <i>n</i> -Hexadecanoic acid methyl ester                                                   | C <sub>17</sub> H <sub>34</sub> O <sub>2</sub> | 270 | 1923(1924) | RI, MS | --   | 0.09 | --   |
| 48.99 | Farnesyl acetone                                                                           | C <sub>18</sub> H <sub>30</sub> O              | 262 | 1925(1927) | RI, MS | 0.21 | 0.23 | 0.32 |
| 49.54 | 2,2'-(1,2-Ethanediy)bis[6,6-dimethyl-bicyclo[3.1.1]hept-2-ene                              | C <sub>20</sub> H <sub>30</sub>                | 270 | 1942       | MS     | 0.37 | --   | --   |
| 50.39 | <i>n</i> -Hexadecanoic acid                                                                | C <sub>16</sub> H <sub>32</sub> O <sub>2</sub> | 256 | 1969(1966) | RI, MS | 0.24 | --   | --   |
| 52.59 | Thunbergol                                                                                 | C <sub>20</sub> H <sub>34</sub> O              | 290 | 2039(2040) | RI, MS | 0.25 | --   | --   |
| 52.91 | 3,7,11,15-Tetramethylhexadeca-1,6,10,14-tetraen-3-ol                                       | C <sub>20</sub> H <sub>34</sub> O              | 290 | 2049(2050) | RI, MS | 0.40 | --   | --   |
| 53.35 | Methyl 2,5-octadecadiynoate                                                                | C <sub>19</sub> H <sub>30</sub> O <sub>2</sub> | 290 | 2063       | MS     | 0.15 | --   | --   |
| 53.66 | 2-[2-(6,6-Dimethylbicyclo[3.1.1]hept-2-en-2-yl)ethyl]-6,6-dimethylbicyclo[3.1.1]hept-2-ene | C <sub>20</sub> H <sub>30</sub>                | 270 | 2073       | MS     | 0.19 | --   | --   |
| 54.69 | 4,8,13-Duvatriene-1,3-diol                                                                 | C <sub>20</sub> H <sub>34</sub> O <sub>2</sub> | 306 | 2107(2109) | RI, MS | 0.04 | --   | --   |

a) RI<sup>a</sup> — Calculation retention index based on the DB-5ms or DB-5 column;

b) RI<sup>b</sup> — Retention index in the literature;

c) -- — Not founded.



**Table S2.** The volatile components in different areas of tobacco

| Retention time (min) | Compounds                   | Formula                                       | RI <sup>a</sup> (RI <sup>b</sup> ) | Identification <sup>c</sup> | Relative content (%) |         |          |        |
|----------------------|-----------------------------|-----------------------------------------------|------------------------------------|-----------------------------|----------------------|---------|----------|--------|
|                      |                             |                                               |                                    |                             | Guizhou              | Guangxi | Shandong | Brzail |
| 12.44                | 6-Methyl-5-hepten-2-one     | C <sub>8</sub> H <sub>14</sub> O              | 980(984)                           | RI, MS                      | 1.20                 | 1.32    | 1.10     | --     |
| 13.37                | Hexyl acetate               | C <sub>8</sub> H <sub>16</sub> O <sub>2</sub> | 1007(1008)                         | RI, MS                      | 0.18                 | 0.11    | 0.20     | 0.10   |
| 13.81                | 1-Isopropyl-2-methylbenzene | C <sub>10</sub> H <sub>14</sub>               | 1019(1019)                         | RI, MS                      | 0.15                 | --      | --       | --     |
| 14.01                | Limonene                    | C <sub>10</sub> H <sub>16</sub>               | 1024(1026)                         | RI, MS                      | 2.23                 | 1.01    | --       | --     |
| 14.20                | Benzyl Alcohol              | C <sub>7</sub> H <sub>8</sub> O               | 1031(1032)                         | RI, MS                      | 2.12                 | --      | 0.35     | --     |
| 14.53                | Benzeneacetaldehyde         | C <sub>8</sub> H <sub>8</sub> O               | 1038(1040)                         | RI, MS                      | 7.92                 | 10.26   | 13.86    | 10.23  |
| 14.84                | <i>p</i> -Menth-4(8)-ene    | C <sub>10</sub> H <sub>18</sub>               | 1046(1041)                         | RI, MS                      | 1.09                 | --      | --       | --     |
| 15.10                | $\tau$ -Terpinene           | C <sub>10</sub> H <sub>16</sub>               | 1053(1055)                         | RI, MS                      | 0.40                 | 0.30    | 0.35     | 0.50   |
| 15.48                | <i>m</i> -Tolualdehyde      | C <sub>8</sub> H <sub>8</sub> O               | 1063                               | MS                          | 0.65                 | --      | 1.14     | 2.40   |
| 15.79                | <i>N</i> -methyl-Aniline    | C <sub>7</sub> H <sub>9</sub> N               | 1071(1069)                         | RI, MS                      | 0.80                 | 0.56    | 0.42     | 0.13   |
| 16.82                | Linalol                     | C <sub>10</sub> H <sub>18</sub> O             | 1098(1098)                         | RI, MS                      | 0.81                 | 1.14    | 0.67     | 0.55   |
| 16.95                | ( <i>Z</i> )-6-Nonenal      | C <sub>9</sub> H <sub>16</sub> O              | 1098(1101)                         | RI, MS                      | 0.80                 | 0.71    | 0.64     | 0.84   |
| 17.17                | 2-Phenylaziridine           | C <sub>8</sub> H <sub>9</sub> N               | 1107                               | MS                          | 0.24                 | 0.90    | 0.19     | --     |
| 17.91                | Phenylethyl alcohol         | C <sub>8</sub> H <sub>10</sub> O              | 1124(1121)                         | RI, MS                      | 0.08                 | 0.20    | 0.56     | --     |
| 18.69                | Camphor                     | C <sub>10</sub> H <sub>16</sub> O             | 1143(1143)                         | RI, MS                      | 0.15                 | 0.18    | --       | --     |
| 18.96                | 2-Phenylpropenal            | C <sub>9</sub> H <sub>8</sub> O               | 1149(1148)                         | RI, MS                      | 0.43                 | 0.47    | 0.72     | 0.87   |
| 19.31                | 3-Ethyl-benzaldehyde        | C <sub>9</sub> H <sub>10</sub> O              | 1158(1161)                         | RI, MS                      | 0.71                 | 1.25    | 1.22     | 3.51   |

|       |                                                          |                                                |            |        |       |       |       |       |
|-------|----------------------------------------------------------|------------------------------------------------|------------|--------|-------|-------|-------|-------|
| 19.52 | 1,4-Benzodioxan                                          | C <sub>8</sub> H <sub>8</sub> O <sub>2</sub>   | 1163(1164) | RI, MS | 0.64  | 1.45  | 1.00  | 2.78  |
| 19.66 | Berberol                                                 | C <sub>10</sub> H <sub>16</sub> O              | 1166(1161) | RI, MS | 0.14  | --    | --    | --    |
| 19.81 | 2,6-Dimethylbenzaldehyde                                 | C <sub>9</sub> H <sub>10</sub> O               | 1170       | MS     | 0.15  | 0.17  | 0.21  | 0.33  |
| 20.01 | Menthol                                                  | C <sub>10</sub> H <sub>20</sub> O              | 1175(1171) | RI, MS | 3.05  | --    | --    | --    |
| 20.20 | Naphthalene                                              | C <sub>10</sub> H <sub>8</sub>                 | 1186(1189) | RI, MS | 0.06  | 0.30  | 0.09  | --    |
| 20.72 | $\alpha$ -Terpineol                                      | C <sub>10</sub> H <sub>18</sub> O              | 1192(1189) | RI, MS | 0.84  | 1.31  | --    | --    |
| 20.86 | 2,6,6-Trimethyl-1,3-cyclohexadiene-1-carboxaldehyde      | C <sub>10</sub> H <sub>14</sub> O              | 1195(1200) | RI, MS | 0.40  | 0.11  | 0.15  | 0.12  |
| 21.20 | Myrtenal                                                 | C <sub>10</sub> H <sub>14</sub> O              | 1203(1201) | RI, MS | 0.24  | 0.68  | 0.23  | --    |
| 21.71 | $\beta$ -Cyclocitral                                     | C <sub>10</sub> H <sub>16</sub> O              | 1215(1219) | RI, MS | 0.35  | --    | 0.13  | --    |
| 22.39 | Methyl thymyl ether                                      | C <sub>11</sub> H <sub>16</sub> O              | 1231(1235) | RI, MS | 0.10  | --    | --    | 0.20  |
| 22.49 | 2-Methylbutyricacid hexyl ester                          | C <sub>11</sub> H <sub>22</sub> O <sub>2</sub> | 1233(1236) | RI, MS | 0.23  | --    | --    | --    |
| 23.23 | <i>p</i> -Formylanisole                                  | C <sub>8</sub> H <sub>8</sub> O <sub>2</sub>   | 1249(1245) | RI, MS | 0.40  | --    | 0.55  | 1.02  |
| 23.75 | 2-methoxy-4-methyl-benzenamine                           | C <sub>8</sub> H <sub>11</sub> NO              | 1263(1294) | RI, MS | 1.27  | 0.54  | 1.35  | 2.21  |
| 24.04 | Butoxy-benzene                                           | C <sub>10</sub> H <sub>14</sub> O              | 1270       | MS     | 1.59  | 1.28  | 2.11  | 3.85  |
| 24.57 | Bornyl acetate                                           | C <sub>10</sub> H <sub>12</sub> O              | 1283(1287) | RI, MS | 0.09  | 1.96  | 0.57  | 3.38  |
| 25.37 | 2-(Phenylmethyl)-1,3-dioxolane                           | C <sub>10</sub> H <sub>12</sub> O <sub>2</sub> | 1301       | MS     | 0.37  | 0.57  | 0.46  | 0.46  |
| 25.54 | Cuminic alcohol                                          | C <sub>10</sub> H <sub>14</sub> O              | 1305(1305) | RI, MS | 0.17  | 0.18  | --    | 0.28  |
| 27.02 | Nicotine                                                 | C <sub>10</sub> H <sub>14</sub> N <sub>2</sub> | 1340(1344) | RI, MS | 6.24  | 1.63  | 4.11  | 3.23  |
| 27.23 | $\alpha$ -Ionene                                         | C <sub>13</sub> H <sub>18</sub>                | 1346(1349) | RI,MS  | 0.13  | 0.15  | 0.19  | 0.28  |
| 27.75 | Solanone                                                 | C <sub>13</sub> H <sub>22</sub> O              | 1358(1360) | RI, MS | 13.06 | 22.69 | 14.72 | 15.32 |
| 28.02 | 5,5-Dimethyl-3-propenyl-2-cyclohexen-1-one               | C <sub>11</sub> H <sub>16</sub> O              | 1363       | MS     | 0.20  | --    | 0.27  | 0.55  |
| 28.52 | 1-(2,6,6-Trimethyl-1,3-cyclohexadien-1-yl)-2-buten-1-one | C <sub>13</sub> H <sub>18</sub> O              | 1375(1373) | RI, MS | 0.65  | 1.20  | 1.47  | 1.64  |
| 28.78 | $\alpha$ -Damascenone                                    | C <sub>13</sub> H <sub>18</sub> O              | 1381(1378) | RI, MS | 1.36  | 0.45  | 1.29  | 1.33  |

|       |                                                                |                                                |            |        |       |       |       |       |
|-------|----------------------------------------------------------------|------------------------------------------------|------------|--------|-------|-------|-------|-------|
| 29.21 | 1-Mesityl-1,3-butadiene                                        | C <sub>13</sub> H <sub>16</sub>                | 1383(1385) | RI, MS | --    | --    | --    | 0.50  |
| 29.73 | β-Damascone                                                    | C <sub>13</sub> H <sub>20</sub> O              | 1403(1402) | RI, MS | 0.55  | 0.42  | 0.21  | --    |
| 30.23 | α-Santalene                                                    | C <sub>15</sub> H <sub>24</sub>                | 1416(1417) | RI, MS | 0.19  | 0.21  | 0.29  | --    |
| 30.57 | Methyl 9-oxodecanoate                                          | C <sub>11</sub> H <sub>20</sub> O <sub>3</sub> | 1424(1429) | RI, MS | 0.44  | 0.61  | 0.39  | 0.71  |
| 31.38 | Geranylacetone                                                 | C <sub>13</sub> H <sub>22</sub> O              | 1444(1445) | RI, MS | 2.91  | 2.68  | 3.52  | 1.57  |
| 32.58 | β-Ionone                                                       | C <sub>13</sub> H <sub>20</sub> O              | 1473(1470) | RI, MS | 0.48  | 0.39  | 0.85  | --    |
| 33.04 | β-Eudesmene                                                    | C <sub>15</sub> H <sub>24</sub>                | 1485(1486) | RI, MS | 0.28  | --    | --    | --    |
| 33.82 | 4-(5,5-Dimethyl-1-oxaspiro[2.5]oct-4-yl)3-buten-2-one,         | C <sub>13</sub> H <sub>22</sub> O <sub>2</sub> | 1504(1501) | RI, MS | 0.32  | --    | --    | --    |
| 34.08 | Octahydro-4a-methyl-1,5-naphthalenedione                       | C <sub>11</sub> H <sub>16</sub> O <sub>2</sub> | 1511       | MS     | 1.84  | 0.80  | 1.18  | 0.82  |
| 34.39 | Spiro[5.6]dodecan-7-one                                        | C <sub>12</sub> H <sub>20</sub> O              | 1519(1524) | RI, MS | 0.76  | --    | --    | --    |
| 34.89 | Nerolidol                                                      | C <sub>15</sub> H <sub>26</sub> O              | 1532(1533) | RI, MS | 0.20  | 0.20  | --    | --    |
| 35.66 | Megastigmatrienone A                                           | C <sub>13</sub> H <sub>18</sub> O              | 1551(1555) | RI, MS | 0.82  | 0.51  | 0.35  | 1.74  |
| 36.41 | Megastigmatrienone B                                           | C <sub>13</sub> H <sub>18</sub> O              | 1571(1573) | RI, MS | 3.33  | 1.98  | 1.98  | 5.85  |
| 36.92 | Bisisobutyric acid 1-tert-butyl-2-methylpropane-1,3-diyl ester | C <sub>16</sub> H <sub>30</sub> O <sub>4</sub> | 1584(1589) | RI, MS | 0.26  | 2.01  | 0.16  | 0.57  |
| 37.61 | Megastigmatrienone C                                           | C <sub>13</sub> H <sub>18</sub> O              | 1602(1604) | RI, MS | 0.56  | 1.07  | 0.88  | 2.00  |
| 38.12 | Megastigmatrienone D                                           | C <sub>13</sub> H <sub>18</sub> O              | 1615(1617) | RI, MS | 1.60  | 0.94  | 1.63  | 2.89  |
| 44.96 | Solavetivone                                                   | C <sub>15</sub> H <sub>22</sub> O              | 1798(1796) | RI, MS | 0.32  | 0.34  | 0.30  | 1.19  |
| 46.07 | Neophytadiene                                                  | C <sub>20</sub> H <sub>38</sub>                | 1833(1836) | RI, MS | 25.56 | 22.91 | 26.56 | 18.37 |
| 49.00 | Farnesyl acetone                                               | C <sub>18</sub> H <sub>30</sub> O              | 1925(1927) | RI, MS | 0.21  | 0.11  | 0.12  | 0.14  |
| 49.54 | 2,2'-(1,2-Ethanediy)bis[6,6-dimethyl-bicyclo[3.1.1]hept-2-ene  | C <sub>20</sub> H <sub>30</sub>                | 1942       | MS     | 0.37  | 2.00  | 0.11  | 0.61  |
| 50.39 | n-Hexadecanoic acid                                            | C <sub>16</sub> H <sub>32</sub> O <sub>2</sub> | 1969(1966) | RI, MS | 0.24  | 0.97  | 0.52  | 0.25  |
| 52.59 | Thunbergol                                                     | C <sub>20</sub> H <sub>34</sub> O              | 2039(2040) | RI, MS | 0.25  | 1.00  | 0.66  | 0.26  |

|       |                                                                                                    |                                                |            |        |      |      |      |      |
|-------|----------------------------------------------------------------------------------------------------|------------------------------------------------|------------|--------|------|------|------|------|
| 52.91 | 3,7,11,15-Tetramethylhexadeca-<br>1,6,10,14-tetraen-3-ol                                           | C <sub>20</sub> H <sub>34</sub> O              | 2049(2050) | RI, MS | 0.40 | 1.08 | 0.26 | 0.27 |
| 53.35 | Methyl 2,5-octadecadiynoate                                                                        | C <sub>19</sub> H <sub>30</sub> O <sub>2</sub> | 2063       | MS     | 0.15 | 0.32 | --   | --   |
| 53.66 | 2-[2-(6,6-Dimethylbicyclo[3.1.1]hept-<br>2-en-2-yl)ethyl]-6,6-<br>dimethylbicyclo[3.1.1]hept-2-ene | C <sub>20</sub> H <sub>30</sub>                | 2073       | MS     | 0.19 | 0.82 | 0.25 | 0.2  |
| 53.97 | Methyl linolelaidate                                                                               | C <sub>19</sub> H <sub>34</sub> O <sub>2</sub> | 2103(2102) | RI, MS | --   | 0.76 | 0.29 | 0.09 |
| 54.69 | 4,8,13-Duvatriene-1,3-diol                                                                         | C <sub>20</sub> H <sub>34</sub> O <sub>2</sub> | 2107(2109) | RI, MS | 0.04 | 0.38 | 0.18 | 0.13 |

a) RI<sup>a</sup> —Calculation retention index based on the DB-5ms or DB-5 column;

b) RI<sup>b</sup> — Retention index in the literature;

c) -- — Not founded.
